# Supplementary material
Source: PubMed Central journal article supplement (PMC1187955)

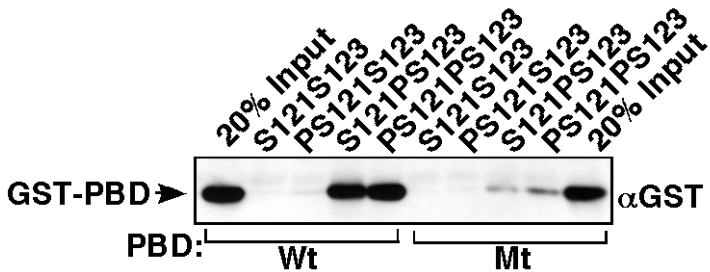

Supplement: pnas_0500410102_1.pdf [file pnas_0500410102_1.pdf]

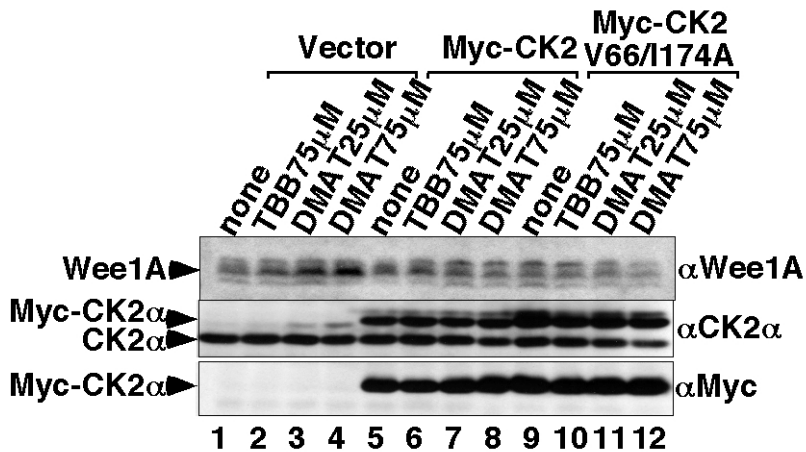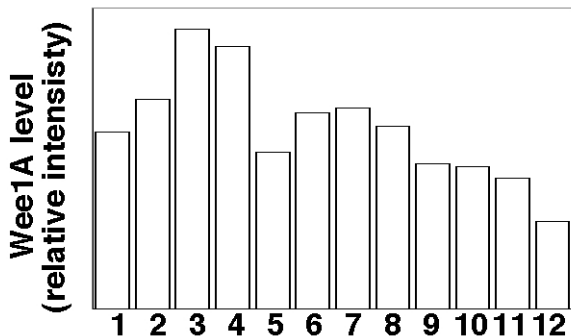

Supplement: pnas_0500410102_2.pdf [file pnas_0500410102_2.pdf]
